# Supplementary material for: Preparation of tungsten carbide nanosheets with large surface area using an in situ DWCNT template
Source: Royal Society of Chemistry journal article supplement (doi:10.1039/c4ra08029g), 2014-01-01
Supplement: c4ra08029g1.pdf [file c4ra08029g1.pdf]

## Electronic Supplementary Material for

Preparation of tungsten carbide nanosheets with high surface area by an in-situ  
DWCNTs template

*Zi Ping Wu, \*<sup>a</sup> Man Zhao, <sup>a</sup> Jing Wei Hu, <sup>a</sup> Wei Bo Zhang, <sup>a</sup> Yan Hong Yin, <sup>a</sup> Ying Yan  
Hu, <sup>a</sup> Ye Sheng Li, <sup>a</sup> Jian Gao Yang, <sup>a</sup> Qian Feng Xu<sup>b</sup> and Ajay Krishnamurthy<sup>c</sup>*

<sup>a</sup> Engineering Research Center of High-efficiency Development and Application  
Technology of Tungsten Resources (Ministry of Education), School of Materials  
Science and Engineering, Jiangxi University of Science and Technology, 86 Hong Qi  
Road, Ganzhou 341000, P. R. China

<sup>b</sup> Chemistry Department, College of Staten Island, City University of New York, 2800  
Victory Boulevard, New York, 10314, United States

<sup>c</sup> Department of Mechanical, Aerospace and Nuclear Engineering, Rensselaer  
Polytechnic Institute, 110 8<sup>th</sup> St, Troy, 12180, United States

\* Corresponding author. Tel: +86-797-8312422. Fax: +86-797-8312422.

E-mail: [wuziping724@mail.jxust.edu.cn](mailto:wuziping724@mail.jxust.edu.cn)

## 1 Figures

Fig. S1 The macro-morphologic of the semifinished sample before (a) and after (b) heated to 600 °C, and carbonized (c) at 950 °C

Fig. S2 Typical SEM image (a) and EDS result (b) from selected area (in SEM image) of the semifinished sample after heated to 600 °C with air

Fig. S3 Typical SEM image (a) and EDS result (b) from selected area (in SEM image) of the semifinished sample after heated to 600 °C with air and carbonized at 950 °C with N<sub>2</sub>

Fig. S4 CV curve of nanosheet WC material at a scanning rate of 100 mv· s<sup>-1</sup>. Note: nanosheet WC loading on the working electrode was controlled to be 0.2 mg cm<sup>-2</sup>

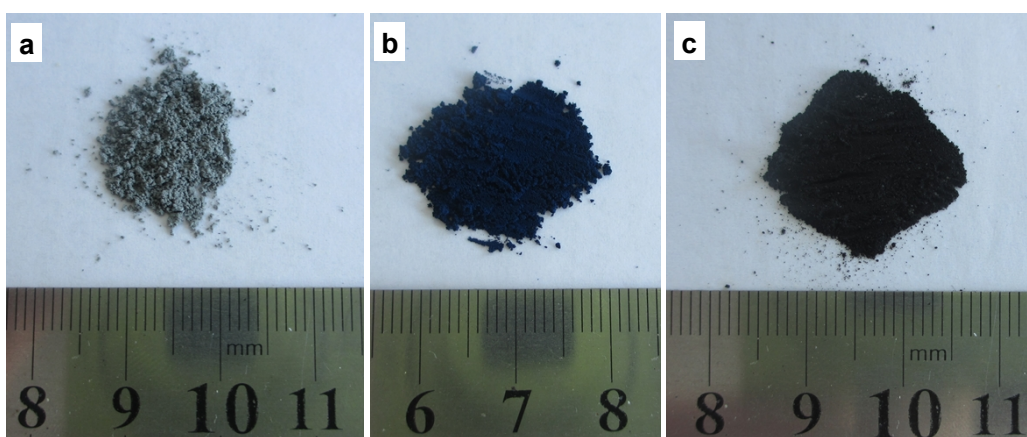

Fig. S1 The macro-morphologic of the semifinished sample before (a) and after (b) heated to 600 °C, and carbonized (c) at 950 °C

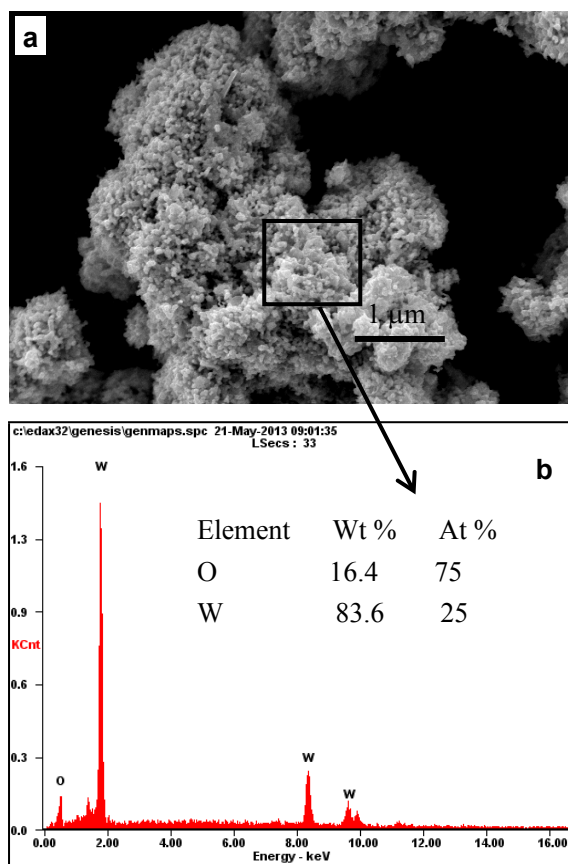

Fig. S2 Typical SEM image (a) and EDS result (b) from selected area (in SEM image) of the semifinished sample after heated to 600 °C with air

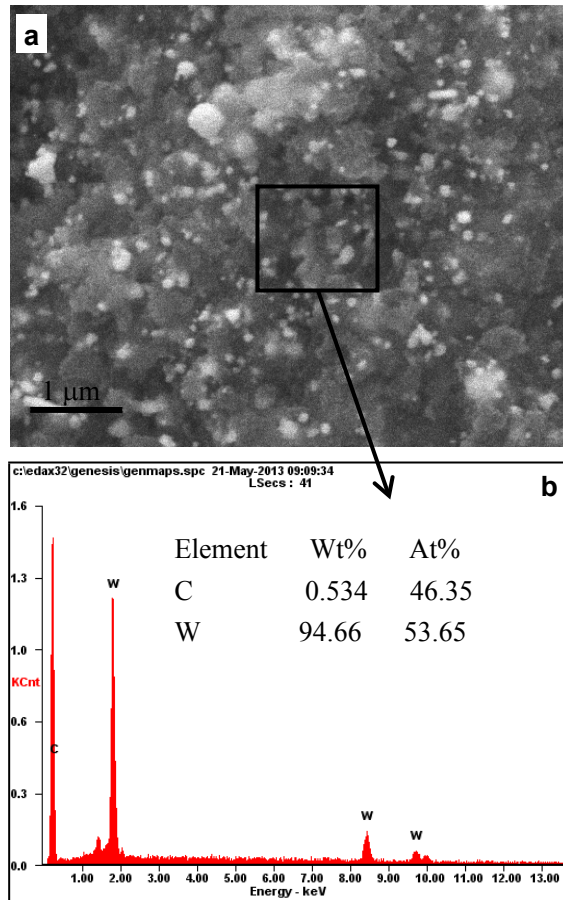

Fig. S3 Typical SEM image (a) and EDS result (b) from selected area (in SEM image) of the semifinished sample after heated to 600 °C with air and carbonized at 950 °C with N<sub>2</sub>

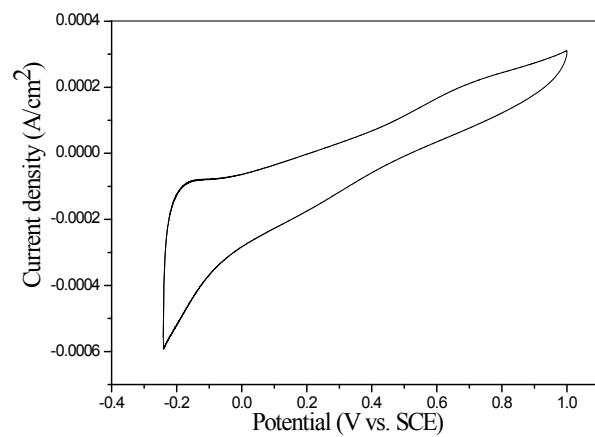

Fig. S4 CV curve of the nanosheet WC material at a scanning rate of  $100 \text{ mV} \cdot \text{s}^{-1}$ .

Note: nanosheet WC loading on the working electrode was controlled to be  $0.2 \text{ mg cm}^{-2}$
